# Supplementary material
Source: HighWire-hosted journal article supplement (https://openheart.bmj.com/content/5/2/e000831)
Supplement: inline-supplementary-material-1 [file inline-supplementary-material-1.docx]

**Supplemental Table 1. Univariable and Multivariable Linear Regression Analyses of the Association of Total Hours per Week Exposed to Second-hand Tobacco Smoke and Echocardiographic Measures of Cardiac Structure and Function in The Echocardiographic Study of Latinos (Echo-SOL)**

|  | **Below the Median Total Hours per Week Exposed to Second-hand Tobacco Smoke (N= 164)** | | | | **At or Above the Median Total Hours per Week Exposed to Second-hand Tobacco Smoke (N= 139)** | | | |
| --- | --- | --- | --- | --- | --- | --- | --- | --- |
|  | **Minimally Adjusted**  **β (SE)** | **P value** | **Adjusted**  **β (SE)** | **P value** | **Minimally Adjusted**  **β (SE)** | **P value** | **Adjusted**  **β (SE)** | **P value** |
| **LV Mass Index, gm/m2** | -1.7 (2.3) | 0.46 | -1.4 (2.2) | 0.51 | 1.1 (2.8) | 0.69 | 1.2 (2.7) | 0.65 |
| **LV End-Systolic Volume, mL** | -1.3 (0.9) | 0.15 | -0.8 (0.9) | 0.36 | 1.0 (1.3) | 0.42 | 1.4 (1.2) | 0.25 |
| **LV End-Diastolic Volume, mL** | -1.7 (1.9) | 0.39 | -1.1 (1.9) | 0.56 | 2.2 (2.8) | 0.43 | 2.9 (2.8) | 0.29 |
| **LV EF, %** | 0.8 (0.50 | 0.15 | 0.4 (0.5) | 0.41 | -0.1 (0.6) | 0.79 | -0.2 (0.6) | 0.76 |
| **LV Stroke Volume, mL** | 0.1 (1.7) | 0.94 | -0.8 (1.7) | 0.62 | 1.3 (2.2) | 0.56 | 1.9 (2.2) | 0.40 |
| **LV Longitudinal Strain (4-Chamber), %** | -0.6 (0.4) | 0.13 | -0.5 (0.4) | 0.18 | 0.1 (0.5) | 0.84 | 0.07 (0.5) | 0.89 |
| **LV Longitudinal Strain (2-Chamber), %** | -0.06 (0.4) | 0.88 | -0.09 (0.4) | 0.80 | -0.2 (0.5) | 0.67 | -0.4 (0.5) | 0.47 |
| **LV Global Longitudinal Strain (Average), %** | -0.3 (0.3) | 0.36 | -0.3 (0.3) | 0.37 | -0.08 (0.5) | 0.9 | -0.2 (0.5) | 0.71 |
| **Medial E’ Velocity, ms** | 0.2 (0.2) | 0.30 | 0.1 (0.2) | 0.49 | -0.004 (0.2) | 0.98 | 0.07 (0.2) | 0.71 |
| **Lateral E’ Velocity, m/s** | 0.3 (0.4) | 0.43 | 0.08 (0.3) | 0.81 | -0.4 (0.3) | 0.17 | -0.3 (0.3) | 0.28 |
| **E/E’** | 0.04 (0.3) | 0.90 | 0.1 (0.3) | 0.66 | -0.08 (0.3) | 0.79 | -0.07 (0.3) | 0.81 |
| **E/A Ratio** | 0.05 (0.03) | 0.11 | 0.05 (0.03) | 0.15 | -0.02 (0.03) | 0.51 | -0.02 (0.03) | 0.54 |
| **Isovolumic relaxation time, ms** | 0.002 (0.002) | 0.17 | 0.002 (0.002) | 0.22 | 0.003 (0.002) | 0.21 | 0.002 (0.002) | 0.33 |
| **Peak RA/RV gradient, mmHg** | -0.6 (0.6) | 0.35 | -0.6 (0.6) | 0.33 | -0.4 (1.0) | 0.66 | -0.3 (1.0) | 0.77 |
| **TAPSE, cm** | 0.02 (0.04) | 0.65 | 0.02 (0.05) | 0.73 | 0.05 (0.07) | 0.50 | 0.07 (0.07) | 0.36 |
| **RV Fractional Area Change, %** | 0.002 (0.01) | 0.87 | -0.003 (0.01) | 0.76 | -0.004 (0.01) | 0.73 | 0.0008 (0.01) | 0.94 |
| **Left Atrial Volume Index, mL/m2** | -0.4 (0.6) | 0.52 | -0.8 (0.6) | 0.17 | -0.19 (0.8) | 0.82 | -0.1 (0.8) | 0.87 |

Reference: Participants who report no current second-hand tobacco smoke exposure.

Linear regression analyses adjusting for the following variables:

Minimally adjusted: age, sex

Fully adjusted: age, sex, study site, alcohol use, physical activity, years of education
